# Supplementary material
Source: PubMed Central journal article supplement (PMC4702597)

1 **Supplemental Figure Legends**

2 **Fig. S1.** Ciliary localization of FKBP- $\beta$ arr2-GFP is greater in response to somatostatin treatment  
3 than rapamycin treatment. Representative images of IMCD cells transfected with (A-I) FKBP  
4 fused to GFP (FKBP-GFP; green) or (J-R) FKBP fused to  $\beta$ arr2 and GFP (FKBP- $\beta$ arr2-GFP;  
5 green) and Sstr3 fused to DsRed and FRB (Sstr3-DsRed-FRB; red). Cells were treated with (A-  
6 C; J-L) DMSO (Veh), or (D-F; M-O) 100 nM rapamycin (Rap), or (G-I; P-R) 10  $\mu$ M  
7 somatostatin (SST) for 10 minutes and fixed. Insets correspond to the boxed regions and show  
8 side views of the cilia. Nuclei were stained with DRAQ5. Bars, 10  $\mu$ m.

9

10 **Fig. S2.** Agonist-mediated decreases in endogenous Sstr3 neuronal ciliary localization requires  
11  $\beta$ arr2. Representative images of hippocampal neurons from  $\beta$ arr2 WT (A-B) and  $\beta$ arr2 KO (C-D)  
12 mice after 7 days in culture, labeled with antibodies to Sstr3 (green) and AC3 (red). Neurons  
13 were either (A, C) treated with vehicle (Veh) or (B, D) treated with 10  $\mu$ M somatostatin (SST)  
14 for 40 minutes. Insets correspond to the boxed regions and show individual channels to aid  
15 visualization. Bars, 10  $\mu$ m.

16

17 **Movie 1.**  $\beta$ -arrestin 1 is not detected in cilia after somatostatin treatment. Time-lapse imaging of  
18 a WT hippocampal neuron expressing  $\beta$ arr1 fused to GFP (green) and Sstr3 fused to DsRed (red)  
19 imaged for 10 minutes after treatment with somatostatin. Sstr3-DsRed is targeted to the cilium  
20 but  $\beta$ arr1-GFP is not detected in cilia before or after somatostatin treatment. Width of field of  
21 view = 90  $\mu$ m. Time compression = 200:1.

22

23 **Movie 2.**  $\beta$ -arrestin 2 localizes to cilia after somatostatin treatment. Time-lapse imaging of a WT  
24 hippocampal neuron expressing  $\beta$ arr2 fused to GFP (green) and Sstr3 fused to DsRed (red)  
25 imaged for 10 minutes after treatment with somatostatin. Prior to addition of somatostatin Sstr3-  
26 DsRed is targeted to the cilium but  $\beta$ arr2-GFP is not detected in cilia. Within 10 minutes of  
27 somatostatin treatment  $\beta$ arr2-GFP localizes throughout the cilium as indicated by overlap with  
28 Sstr3-DsRed. Width of field of view = 90  $\mu$ m. Time compression = 200:1.

29

30 **Movie 3.** The same time-lapse images as in Movie S2 with the red channel turned off to aid  
31 visualization of  $\beta$ arr2-GFP ciliary localization. Prior to addition of somatostatin  $\beta$ arr2-GFP  
32 (green) is not detected in cilia. Within 10 minutes of somatostatin treatment  $\beta$ arr2-GFP localizes  
33 throughout the cilium. Width of field of view = 90  $\mu$ m. Time compression = 200:1.

# Supplemental Figure 1

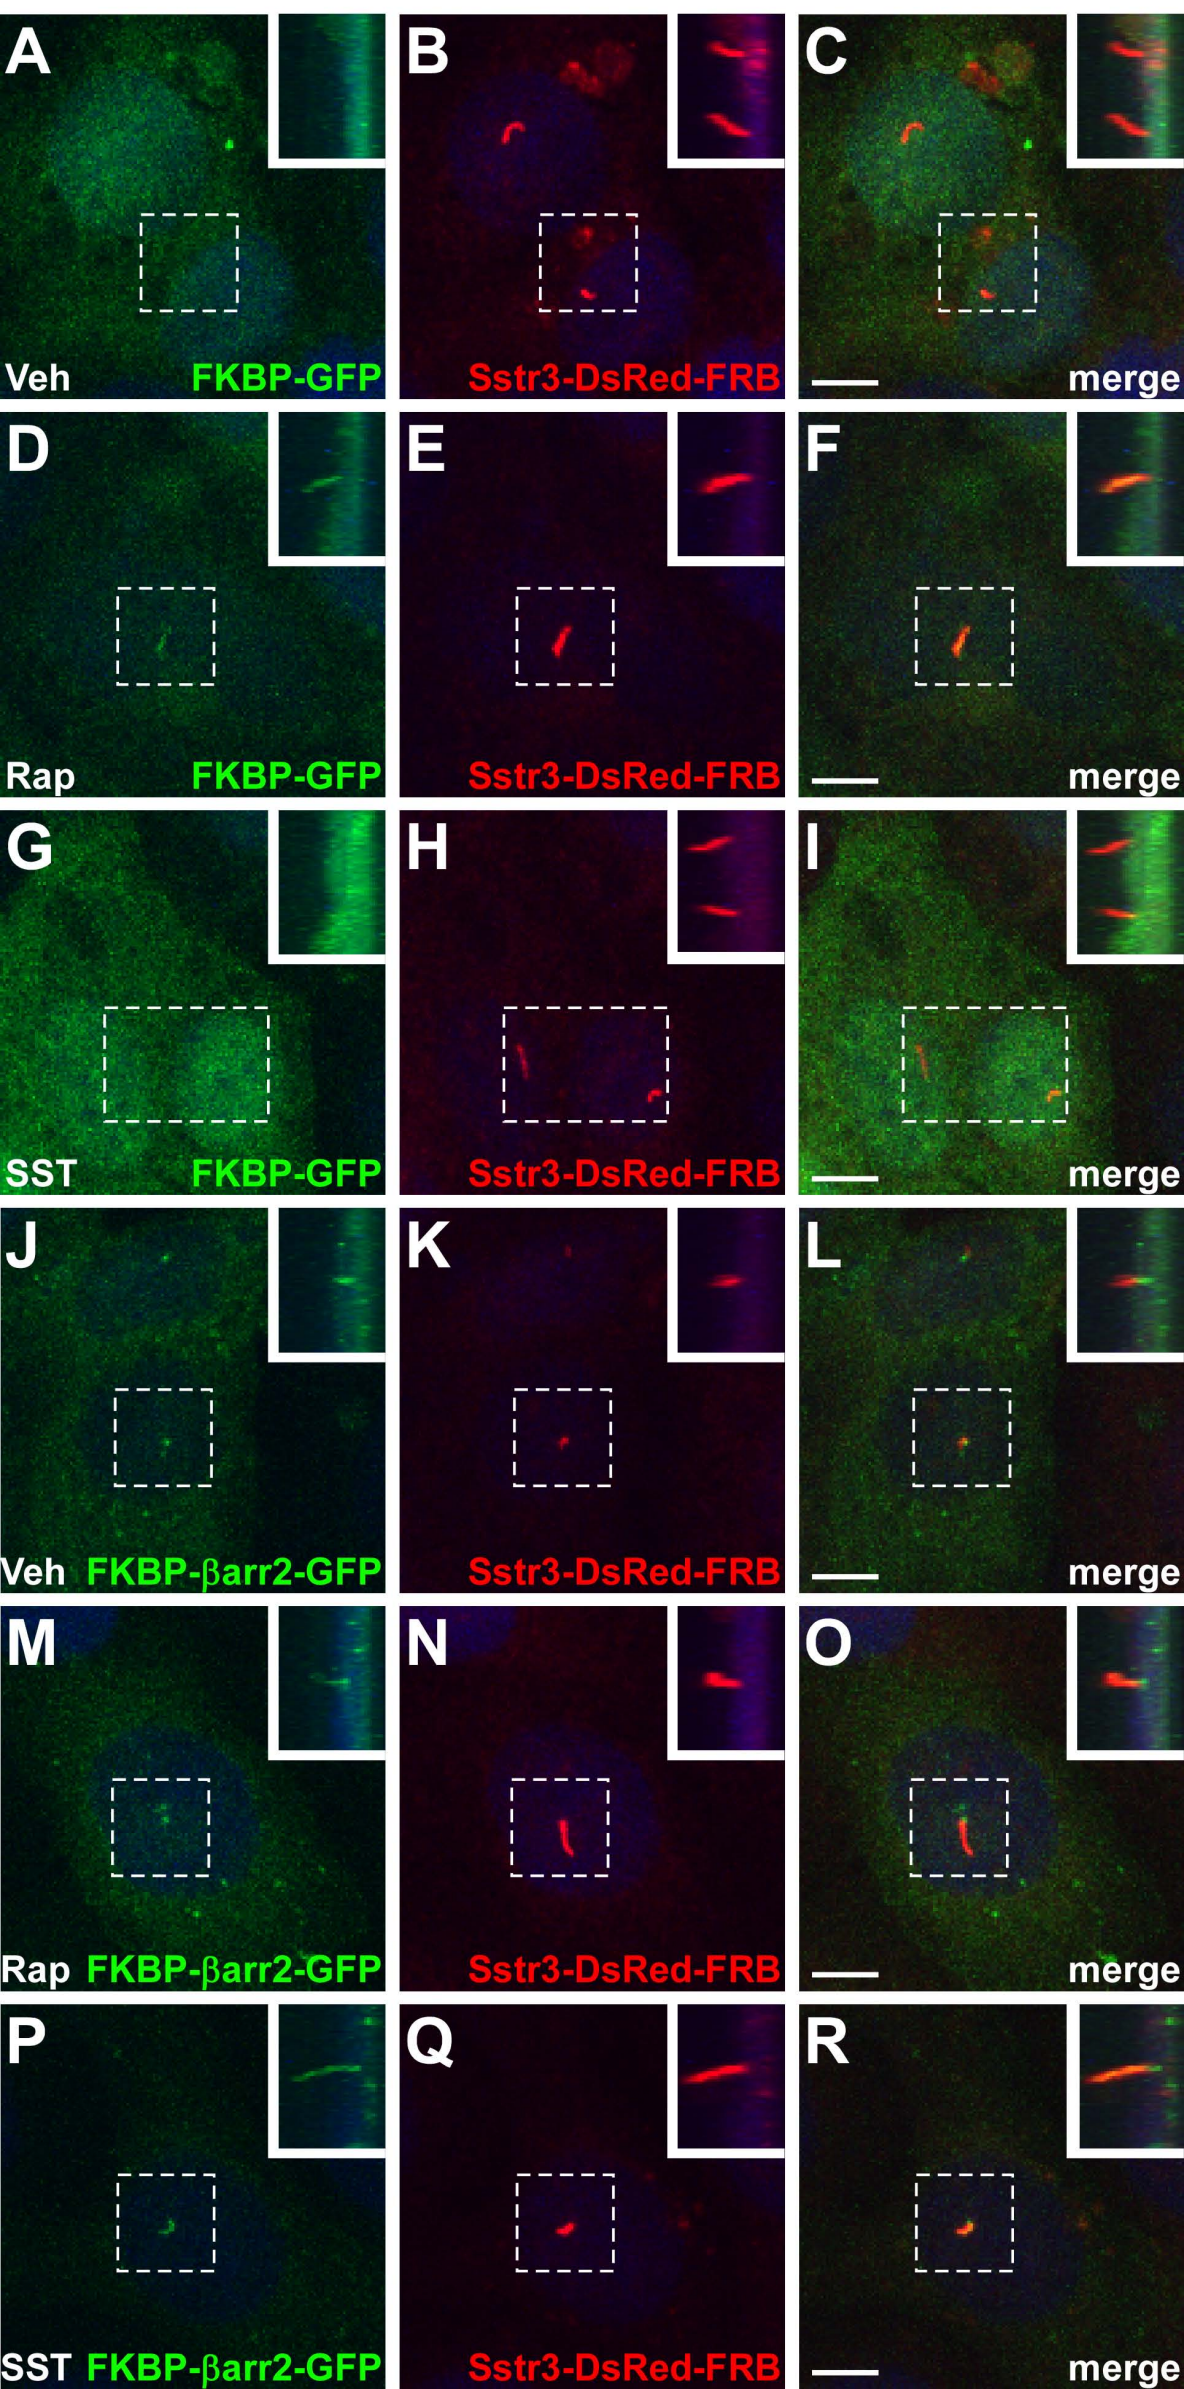

# Supplemental Figure 2

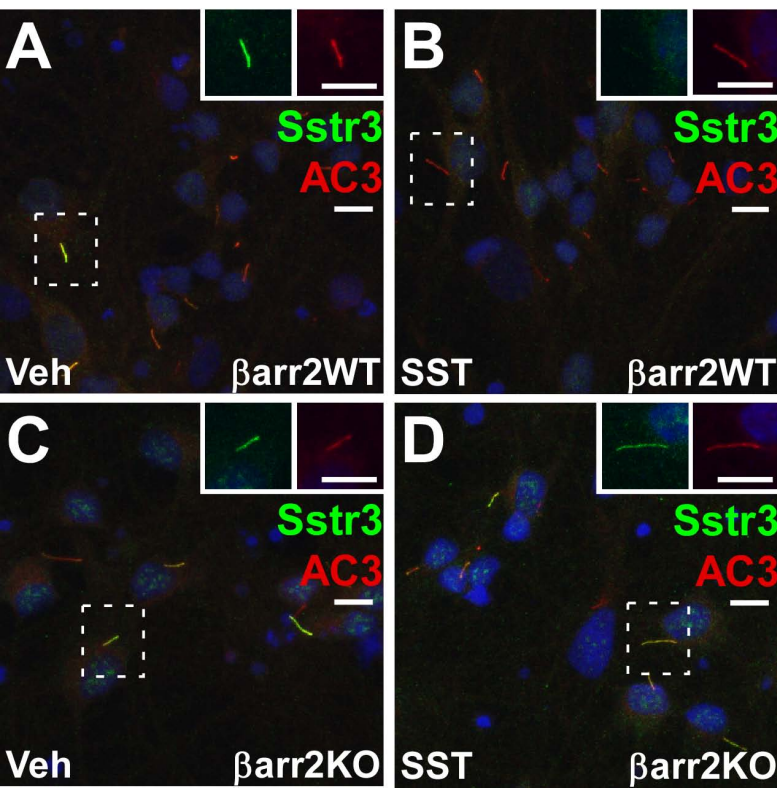

Supplement: MCB.00765-15_zmb999101080so1.pdf [file MCB.00765-15_zmb999101080so1.pdf]
